# Supplementary figures and images for: Insight into the bZIP Gene Family in Solanum tuberosum: Genome and Transcriptome Analysis to Understand the Roles of Gene Diversification in Spatiotemporal Gene Expression and Function
Source: MDPI journal article supplement (doi:10.3390/ijms22010253), 2020-12-29

## N-terminal Motifs

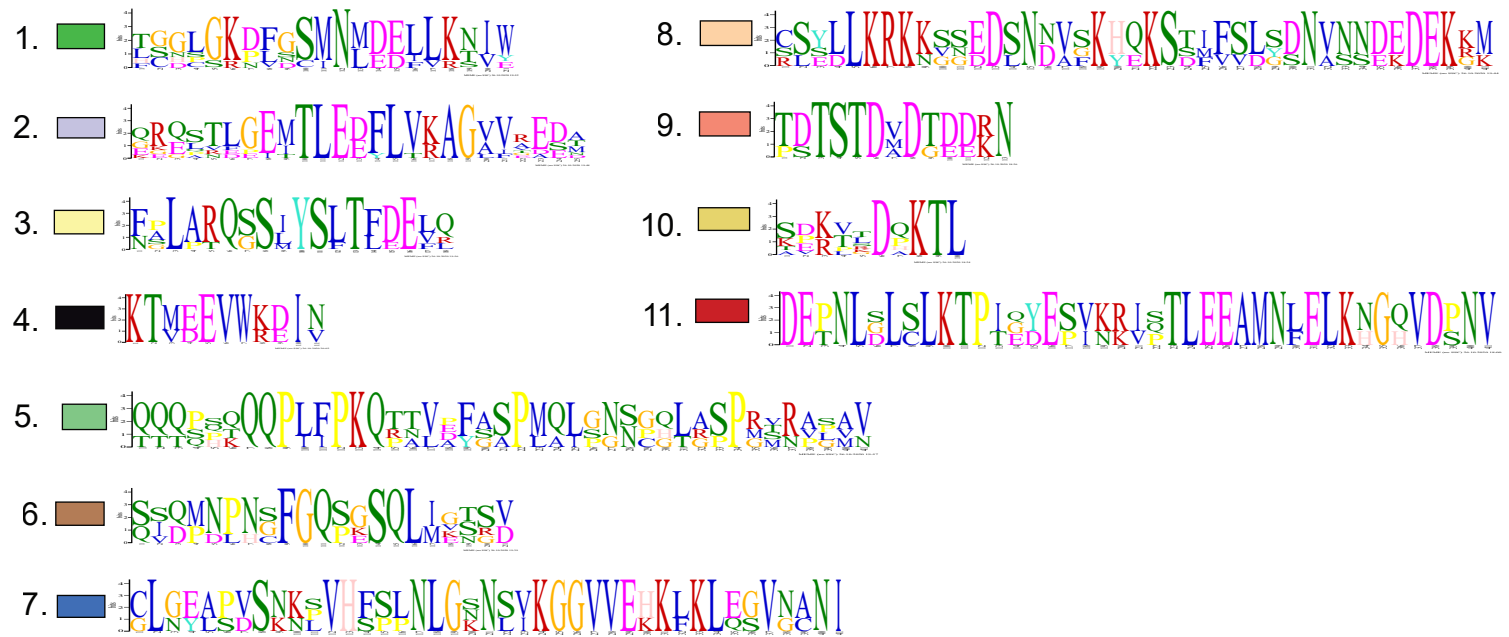

## Basic and Leucine Rich Motifs

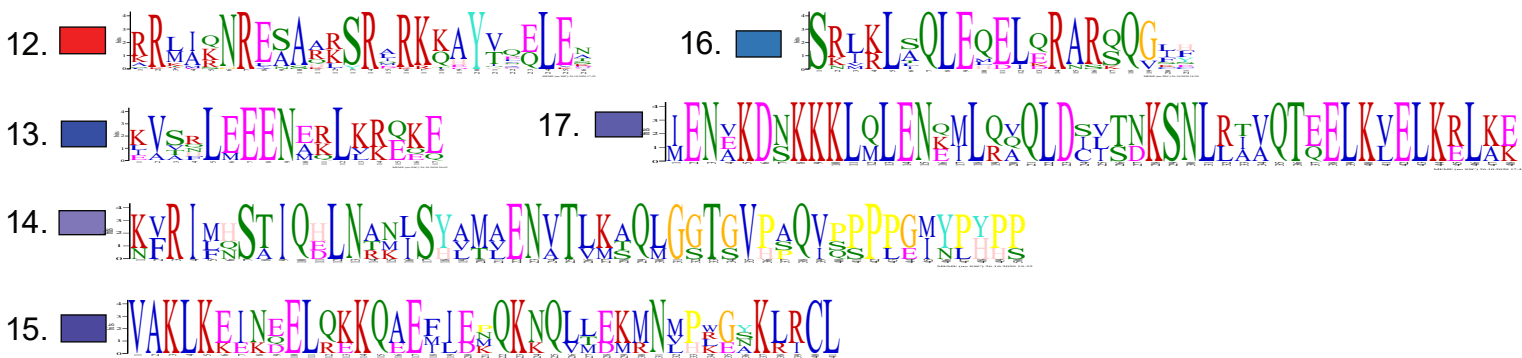

## C-terminal motifs

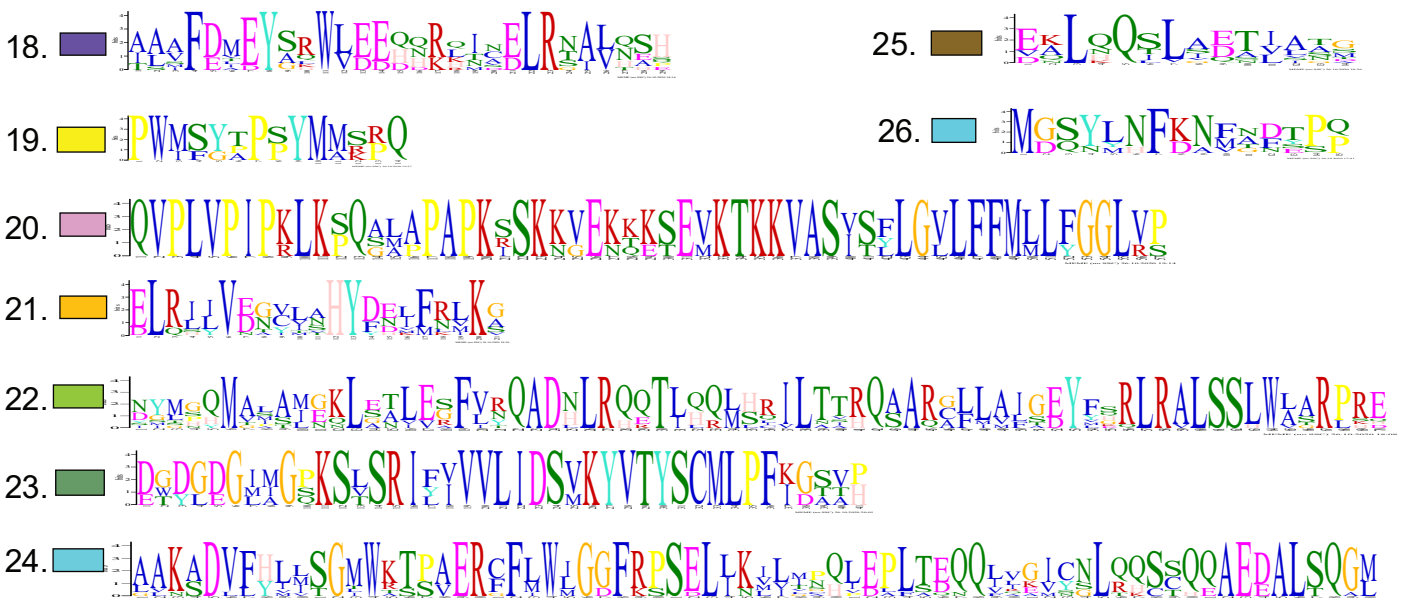

Supplement: s1 [file s1]
